# Supplementary material for: Induction of Neuronal Death by Microglial AGE-Albumin: Implications for Alzheimer’s Disease
Source: PubMed Central journal article supplement (PMC3360664; doi:10.1371/journal.pone.0037917), 2012-05-25

Figure S1

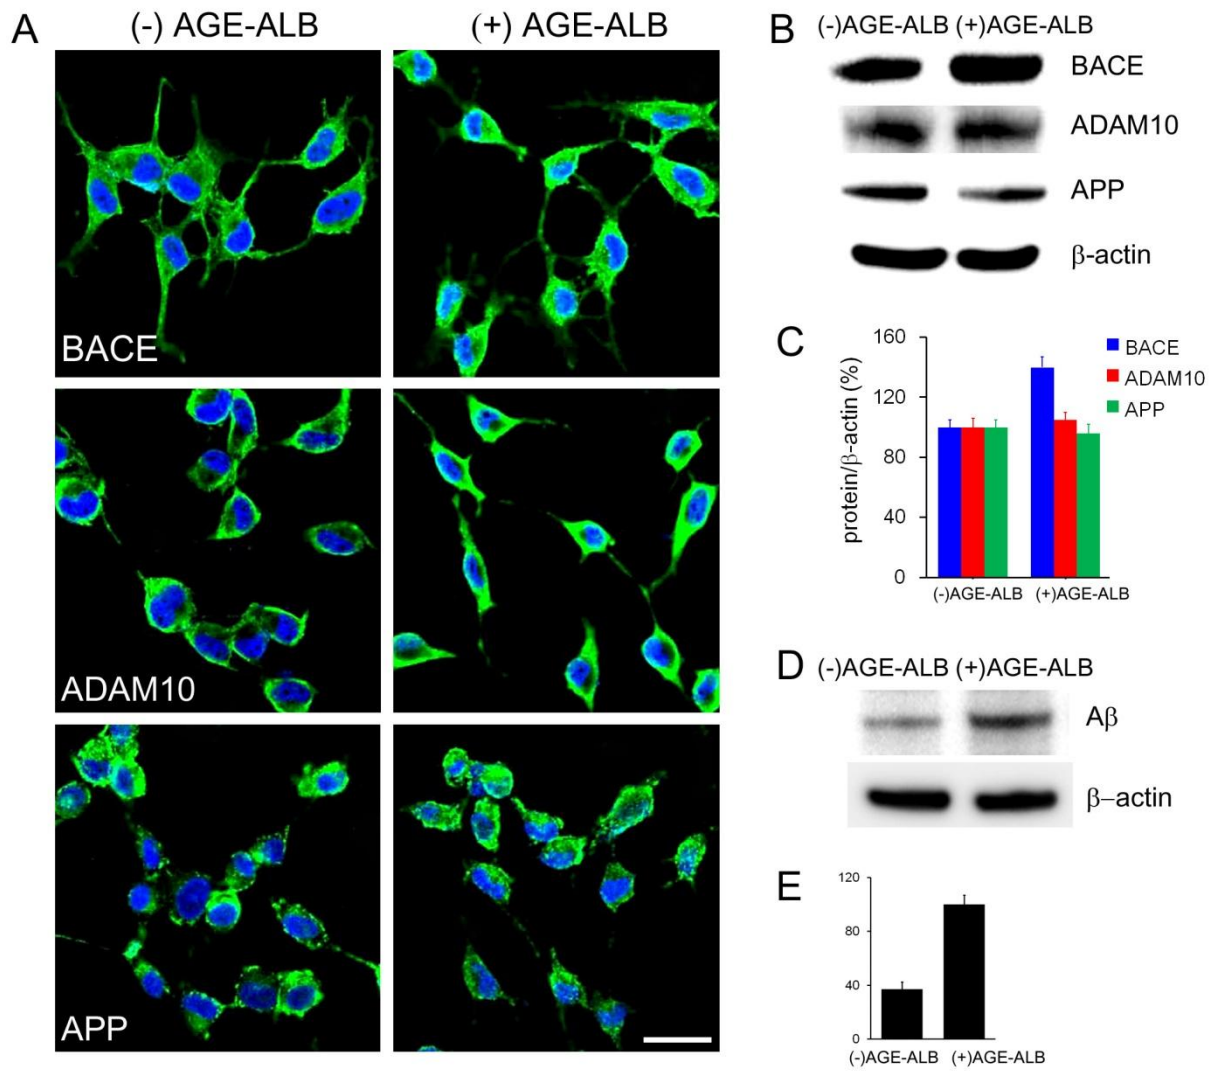

Supplement: pone.0037917.s001.pdf [file pone.0037917.s001.pdf]
